# Supplementary material
Source: PubMed Central journal article supplement (PMC1046877)
Supplement: pnas_102_7_2448__1.pdf [file pnas_102_7_2448__1.pdf]

**Table 1. Correlation of sample replicates**

| <b>Subset</b>                                                     | <b>Numbers of genes called present</b> |                    |             | <b><math>r^2</math> value of replicates</b> |
|-------------------------------------------------------------------|----------------------------------------|--------------------|-------------|---------------------------------------------|
|                                                                   | <b>Replicate 1</b>                     | <b>Replicate 2</b> | <b>Both</b> | <b>For genes called present</b>             |
| Sca <sup>+</sup> Kit <sup>+</sup> 38 <sup>+</sup> 34 <sup>-</sup> | 4,843                                  | 4,877              | 4,413       | 0.999                                       |
| Sca <sup>+</sup> Kit <sup>+</sup> 38 <sup>+</sup> 34 <sup>+</sup> | 4,016                                  | 4,379              | 3,694       | 0.999                                       |
| Sca <sup>+</sup> Kit <sup>+</sup> 38 <sup>-</sup> 34 <sup>+</sup> | 3,445                                  | 4,225              | 3,268       | 0.999                                       |
