# Supplementary material
Source: PubMed Central journal article supplement (PMC1046877)
Supplement: pnas_102_7_2448__4.pdf [file pnas_102_7_2448__4.pdf]

**Table 2. Genes expressed at a high level in the 38<sup>+</sup>34<sup>-</sup> (LTR) HSC subset**

| Category                           | Symbol                                                     | Gene description                                                                  | Correlation | Unigene   |
|------------------------------------|------------------------------------------------------------|-----------------------------------------------------------------------------------|-------------|-----------|
| Regulation of transcription        | Rnps1                                                      | ribonucleic acid binding protein S1                                               | 1.000       | Mm.1951   |
|                                    | Junb                                                       | Jun-B oncogene                                                                    | 1.000       | Mm.1167   |
|                                    | Hdac3                                                      | histone deacetylase 3                                                             | 1.000       | Mm.20521  |
|                                    | Irf6                                                       | interferon regulatory factor 6                                                    | 1.000       | Mm.4179   |
|                                    | Gata3                                                      | GATA binding protein 3                                                            | 0.997       | Mm.606    |
|                                    | Xbp1                                                       | X-box binding protein 1                                                           | 0.993       | Mm.22718  |
|                                    | Cited2                                                     | Cbp/p300-interacting transactivator, with Glu/Asp-rich carboxy-terminal domain, 2 | 0.992       | Mm.9524   |
|                                    | Nmyc1                                                      | neuroblastoma myc-related oncogene 1                                              | 0.986       | Mm.16469  |
| Membrane association               | Zfp292                                                     | zinc finger protein 292                                                           | 0.975       | Mm.38193  |
|                                    | Bdkrb1                                                     | bradykinin receptor, beta 1                                                       | 1.000       | Mm.57076  |
|                                    | Mpl                                                        | myeloproliferative leukemia virus oncogene                                        | 0.998       | Mm.4864   |
|                                    | Map17                                                      | membrane-associated protein 17                                                    | 0.995       | Mm.30181  |
|                                    | Ormdl3                                                     | ORM1-like 3 ( <i>S. cerevisiae</i> )                                              | 0.990       | Mm.180546 |
|                                    | Fzd4                                                       | frizzled homolog 4 ( <i>Drosophila</i> )                                          | 0.988       | Mm.68712  |
|                                    | Lgi4                                                       | leucine-rich repeat LGI family, member 4                                          | 0.961       | Mm.1662   |
| Signal transduction                | Kit                                                        | kit oncogene                                                                      | 0.961       | Mm.4394   |
|                                    | Bdkrb1*                                                    | bradykinin receptor, beta 1                                                       | 1.000       | Mm.57076  |
|                                    | Socs2                                                      | suppressor of cytokine signaling 2                                                | 0.996       | Mm.4132   |
|                                    | Fzd4*                                                      | frizzled homolog 4 ( <i>Drosophila</i> )                                          | 0.988       | Mm.68712  |
|                                    | Inpp5d                                                     | inositol polyphosphate-5-phosphatase D                                            | 0.958       | Mm.15105  |
| Ubiquitin ligase complex           | Fbxo9                                                      | f-box only protein 9                                                              | 1.000       | Mm.28584  |
|                                    | Nedd4                                                      | neural precursor cell expressed, developmentally down-regulated gene 4            | 0.993       | Mm.16553  |
|                                    | Rnf11                                                      | ring finger protein 11                                                            | 0.992       | Mm.25228  |
| ATP binding                        | Ian1                                                       | immune associated nucleotide 1                                                    | 0.999       | Mm.28395  |
|                                    | Iigp                                                       | interferon-inducible GTPase                                                       | 0.997       | Mm.29008  |
|                                    | Ifi47                                                      | interferon gamma inducible protein                                                | 0.984       | Mm.24769  |
| GTP binding                        | Tgtp                                                       | T-cell specific GTPase                                                            | 0.994       | Mm.15793  |
|                                    | Igtp                                                       | interferon gamma induced GTPase                                                   | 0.993       | Mm.858    |
| Serine protease inhibitor activity | Serpib6a                                                   | serine (or cysteine) proteinase inhibitor, clade B, member 6a                     | 0.996       | Mm.2623   |
|                                    | Serpina3g                                                  | serine (or cysteine) proteinase inhibitor, clade A, member 3G                     | 0.987       | Mm.15085  |
| Protein binding                    | Camk2b                                                     | calcium/calmodulin-dependent protein kinase II, beta                              | 0.999       | Mm.4857   |
|                                    | Gab1                                                       | growth factor receptor bound protein 2-associated protein 1                       | 0.997       | Mm.24573  |
|                                    | Gabarapl1                                                  | gamma-aminobutyric acid [GABA(A)] receptor-associated protein-like 1              | 0.997       | Mm.14638  |
|                                    | Mttr13                                                     | myotubularin related protein 13                                                   | 0.996       | Mm.200250 |
| Metal ion binding                  | Mt2                                                        | metallothionein 2                                                                 | 0.999       | Mm.147226 |
|                                    | Car2                                                       | carbonic anhydrase 2                                                              | 0.995       | Mm.1186   |
| Cell cycle                         | Cdkn1c                                                     | cyclin-dependent kinase inhibitor 1C (P57)                                        | 0.986       | Mm.168789 |
| Lipocalin                          | Lcn7                                                       | lipocalin 7                                                                       | 0.999       | Mm.15801  |
| Uncharacterized                    | Sixteen genes with unknown functions are listed in table 4 |                                                                                   |             |           |

Listed are genes that are differentially highly expressed in the 38<sup>+</sup>34<sup>-</sup> (LTR) HSC subset and low in the other two STR HSC subsets.

\*Membrane-associated signal transduction molecules
