# Supplementary material
Source: PubMed Central journal article supplement (PMC1046877)
Supplement: pnas_102_7_2448__5.pdf [file pnas_102_7_2448__5.pdf]

**Table 3. Genes expressed at a low level in 38<sup>+</sup>34<sup>-</sup> cells and high in other subsets**

| Category           | Symbol                                                  | Gene description                                | Correlation | Unigene  |
|--------------------|---------------------------------------------------------|-------------------------------------------------|-------------|----------|
| Transcription      | Satb1                                                   | Special AT-rich sequence binding protein 1      | 0.955       | Mm.4381  |
| Membrane           | Ptpro                                                   | Protein tyrosine phosphatase, receptor type, O  | 0.999       | Mm.4715  |
| Association        | Sell                                                    | Selectin, lymphocyte                            | 0.988       | Mm.1461  |
| Signal             |                                                         |                                                 |             |          |
| Transduction       | Ccl9                                                    | Chemokine (C-C motif) ligand 9                  | 0.988       | Mm.2271  |
| Protein Binding    | Cnn3                                                    | Calponin 3, acidic                              | 0.988       | Mm.22171 |
|                    | Lgals3                                                  | Lectin, galactose binding, soluble 3            | 0.971       | Mm.2970  |
| Cell Growth        | Mki67                                                   | Antigen identified by monoclonal antibody Ki 67 | 0.998       | Mm.4078  |
|                    | Bin1                                                    | Bridging integrator 1                           | 0.977       | Mm.4383  |
| Catalytic Activity | Sult4a1                                                 | Sulfotransferase family 4A, member 1            | 1.000       | Mm.20451 |
|                    | Hdc                                                     | Histidine decarboxylase                         | 0.996       | Mm.18603 |
| Uncharacterized    | Nine genes with unknown functions are listed in table 4 |                                                 |             |          |

Correlation is Pearson correlation to the anticorrelation pattern of stem cell activity.
