# Supplementary material
Source: PubMed Central journal article supplement (PMC1046877)
Supplement: pnas_102_7_2448__6.pdf [file pnas_102_7_2448__6.pdf]

**Table 4. Protein sequence analysis of some potential stem cell genes with unknown function**

| <b>Uncharacterized genes</b> | <b>Protein domain and similarity</b>                           | <b>Correlation</b> | <b>Unigene</b> |
|------------------------------|----------------------------------------------------------------|--------------------|----------------|
| A430017F18*                  | No similar gene                                                | 1.000              | Mm.44883       |
| AU044919*                    | No similar gene                                                | 1.000              | Mm.14438       |
| 2310075M17Rik*               | Similar to S3543 GTP-binding protein (90%)                     | 0.999              | Mm.196592      |
| Ell2-pending*                | Eleven-nineteen lysine-rich leukemia gene 2                    | 0.998              | Mm.21288       |
| LOC207685*                   | Hypothetical protein                                           | 0.998              | Mm.38214       |
| 2310061I04Rik*               | No similar gene                                                | 0.998              | Mm.5624        |
| 5830431A10Rik*               | Contain Cor1/Xlr/Xmr conserved region                          | 0.997              | Mm.1148        |
| 2700007P21Rik*               | Unknown protein                                                | 0.997              | Mm.3587        |
| B930086G17*                  | No similar gene                                                | 0.992              | Mm.24738       |
| 2410166I05Rik*               | Hypothetical protein                                           | 0.989              | Mm.30153       |
| D10ErtD749e*                 | Similar to ZW10 interacting protein-1                          | 0.986              | Mm.38994       |
| 2210023F24Rik*               | Contain B-box Zn-finger and SPRY domain                        | 0.983              | Mm.5510        |
| Riken 4237666*               | No significant similar gene                                    | 0.978              | Mm.276231      |
| 6230421P05Rik*               | No similar gene                                                | 0.978              | Mm.26147       |
| 4631408O11Rik*               | No similar gene                                                | 0.964              | Mm.2935        |
| 1110054N06Rik*               | Unknow protein with Ankyrin repeat                             | 0.960              | Mm.15351       |
| D13ErtD275e                  | Hypothetical protein                                           | -0.952             | Mm.21231       |
| Plac8                        | Uncharacterized Cys-rich domain containing protein             | -0.960             | Mm.34609       |
| Cluster Incl X15378          | Similar to Myeloperoxidase and Eosinophil peroxidase precursor | -0.975             | Mm.4668        |
| Cluster Incl X67863          | Similar to Octapeptide-repeat protein T2                       | -0.995             | Mm.35868       |
| AW060549                     | Similar to Retrovirus-related POL polyprotein                  | -0.999             | Mm.29177       |
| Cluster Incl X90778          | Similar to Histone H2B                                         | -1.000             | Mm.21579       |
| BC018347                     | Similar to translation initiation factor IF-2                  | -1.000             | Mm.154309      |
| 2610036L13Rik                | No similar gene                                                | -1.000             | Mm.23526       |
| AI132321                     | Contain phospholipase D active site motif                      | -1.000             | Mm.203915      |

The protein sequence of each gene with unknown functions from Tables 2 and 3 was searched against the National Center for Biotechnology Information protein database for conserved functional domains and similar proteins. Genes from Table 2 are indicated by \*.
