# Supplementary material
Source: PubMed Central journal article supplement (PMC1046877)
Supplement: pnas_102_7_2448__7.pdf [file pnas_102_7_2448__7.pdf]

**Table 5. Genes with GATA3-binding sites**

| Genes with four binding sites | Genes with three binding sites                                                                                        | Genes with two binding sites                                                                                                                                                                                                                                                   | Genes with one binding site                                                                                                                                                                                                                                                           |
|-------------------------------|-----------------------------------------------------------------------------------------------------------------------|--------------------------------------------------------------------------------------------------------------------------------------------------------------------------------------------------------------------------------------------------------------------------------|---------------------------------------------------------------------------------------------------------------------------------------------------------------------------------------------------------------------------------------------------------------------------------------|
| D6Wsu147e<br>H2-Eb1<br>Hbb-b1 | Gtpi-pending*<br>Irf6*<br>Serpib6*<br>Ap3m1<br>Ctf1<br>Cyp4b1<br>Dntt<br>E2f5<br>Fah<br>Pml<br>Ptprc<br>Slpi<br>Tcf12 | Fxyd3*<br>Fzd4*<br>Ifi47*<br>Igtp*<br>Iigp*<br>Inpp5d*<br>Mpl*<br>Nedd4a*<br>Tgtp*<br>Cc9**<br>Mpo**<br>BC018347**<br>Btg3<br>Capns1<br>Car1<br>Cc17<br>Ctsc<br>Ctsz<br>Fkbp4<br>Gp49a<br>H2bfs<br>MGC6664<br>Nudel-pending<br>Surf4<br>Ubap<br>Vcl<br>Wbscr5<br>1110049G11Rik | Camk2b*<br>Cited2*<br>Hdac3*<br>Kit*<br>Lcn7*<br>Xbp1*<br>Zfp292*<br>9030401P18Rik*<br>Sell**<br>Abcb10<br>Anxa2<br>Apoe<br>Cnlp<br>Coq7<br>Cox6a2<br>Dstn<br>Glk<br>Ltf<br>Nptx2<br>Psm13<br>Ptpn16<br>S100a9<br>Satb1<br>Tpm2<br>Tyrobp<br>Zfp100<br>1810027O01Rik<br>2310035M22Rik |

The DNA sequence 10 kb upstream of start codons of interrogated genes was searched for GATA3-binding sites. Genes that have GATA3-binding sites with P values < 0.05 in randomization test are listed by number of binding sites (\*, in Table 2; \*\*, in Table 3).
