# Supplementary material
Source: PubMed Central journal article supplement (PMC1046877)

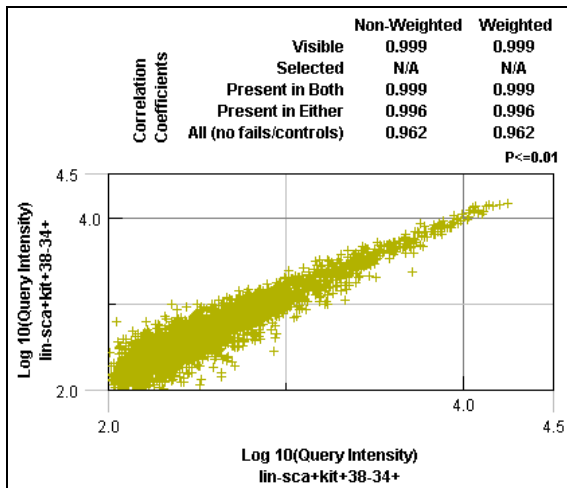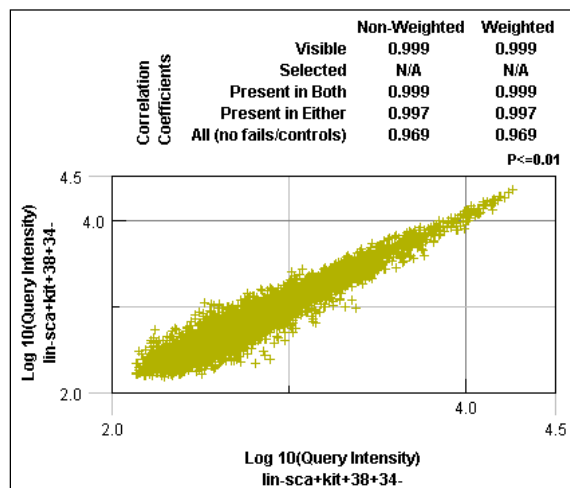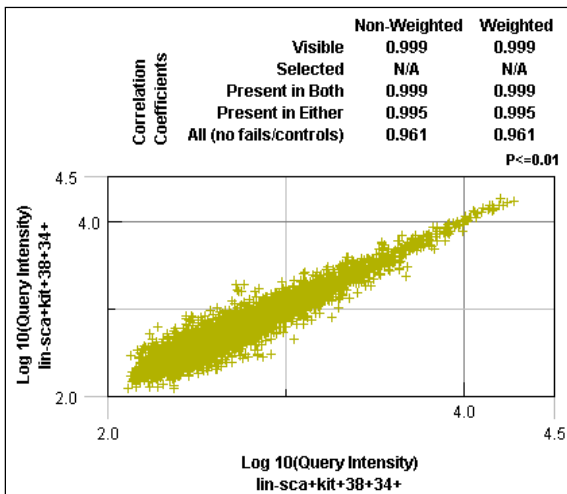

Supplement: pnas_102_7_2448__2.pdf [file pnas_102_7_2448__2.pdf]

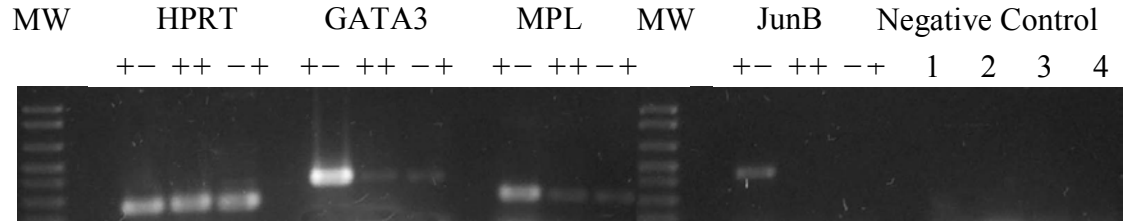

Supplement: pnas_102_7_2448__8.pdf [file pnas_102_7_2448__8.pdf]
